# Supplementary material for: Metal-organic gel as a fluorescence sensing platform to trace copper(ii)
Source: Royal Society of Chemistry journal article supplement (doi:10.1039/d1ay01716k), 2021-11-23
Supplement: d1ay01716k1.pdf [file d1ay01716k1.pdf]

## **Metal-Organic Gel as a Fluorescence Sensing Platform to Trace Copper (II)**

Hao Qi<sup>1</sup>, Tianli Zhang<sup>1</sup>, Chuang Jing<sup>1</sup>, Zhen Zhang<sup>1</sup>, Yujie Chen<sup>1</sup>, Yali Chen<sup>1</sup>, Qiliang Deng<sup>1\*</sup>  
and Shuo Wang<sup>1,2\*</sup>

1. State Key Laboratory of Food Nutrition and Safety, Key Laboratory of Food Nutrition and Safety,  
Ministry of Education of China, Tianjin University of Science and Technology, Tianjin 300457,  
China.

2. Tianjin Key Laboratory of Food Science and Health, School of Medicine, Nankai University,  
Tianjin 300071, China.

\* To whom correspondence should be addressed:

Prof.Deng:yhdql@tust.edu.cn or Prof.Wang: wangshuo@nankai.edu.cn

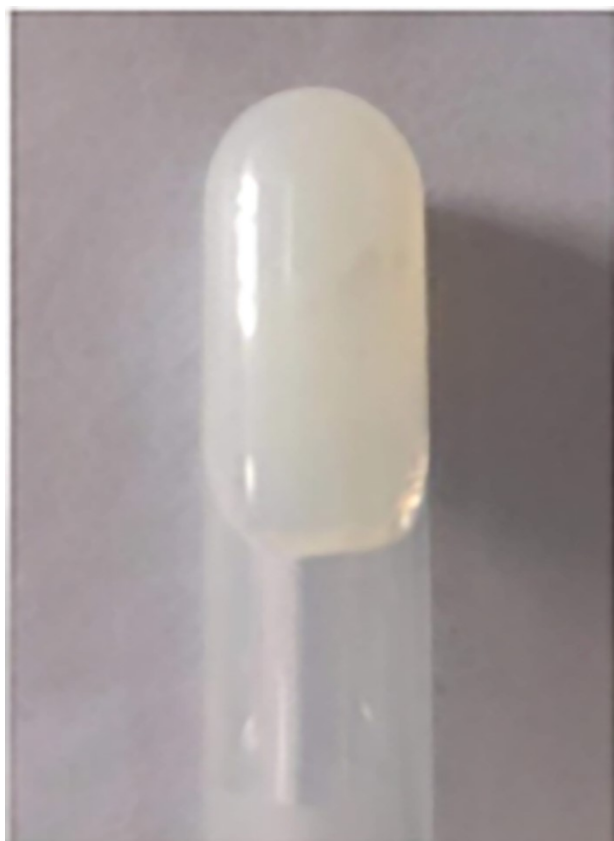

**Fig.S1.** Photograph of MOG-Al turning upside down.

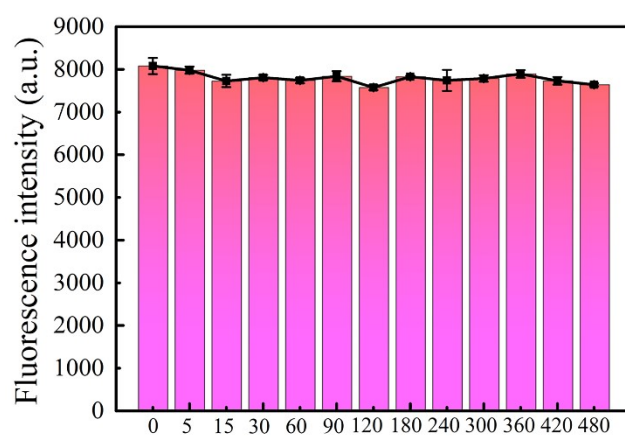

**Fig. S2.** Time-dependent fluorescence intensity of MOG-Al (7 mg·L<sup>-1</sup>) in HEPES at pH 8.0.

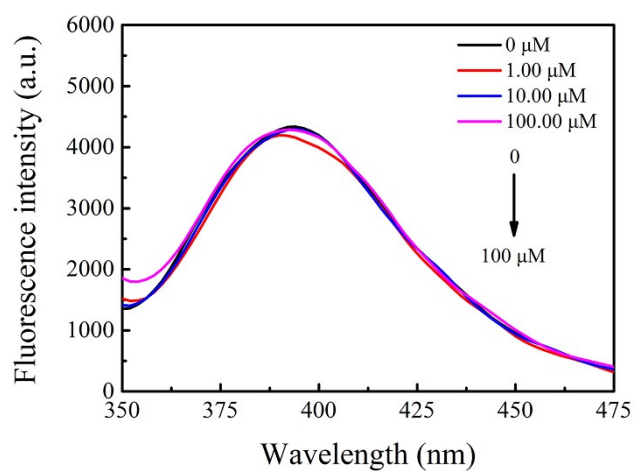

**Fig. S3.** Fluorescence responses of H<sub>4</sub>TCPB to different amounts of Cu<sup>2+</sup> (1.00 μM, 10.00 μM, 100.00 μM)

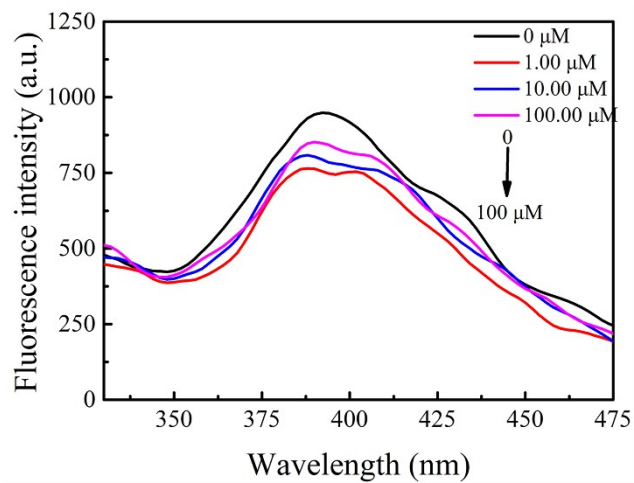

**Fig. S4.** Fluorescence responses of 2,5-pzdc to different amounts of Cu<sup>2+</sup> (1.00 μM, 10.00 μM, 100.00 μM)

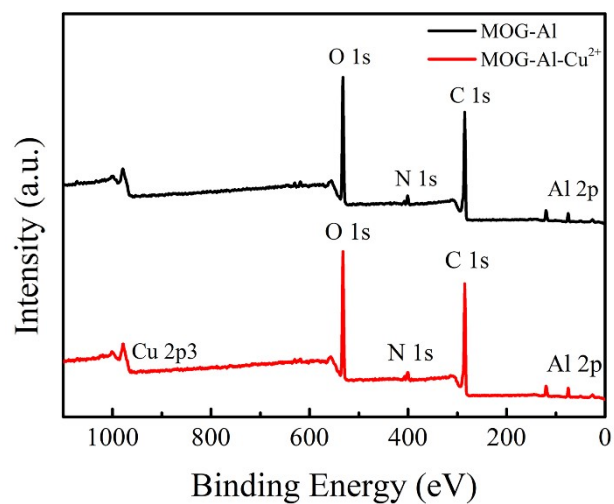

**Fig. S5.** XPS spectrum of MOG-Al and MOG-Al with  $\text{Cu}^{2+}$

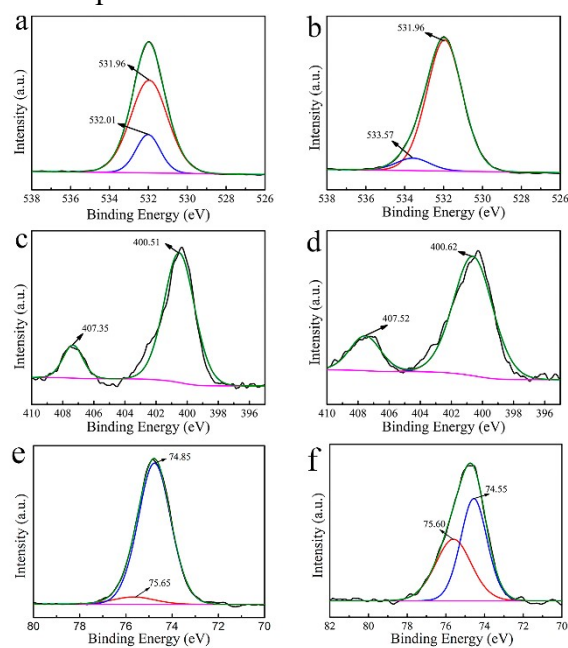

**Fig.S6.** High resolution O 1s, N 1s and Al 2p XPS spectra of MOG-Al before (a, c, e) and after (b, d, f) loading with  $\text{Cu}^{2+}$ .
